## Seroepidemiology of human leptospirosis in the Dominican Republic: a multistage cluster survey, 2021

**Authors:** Eric J. Nilles MD,<sup>1,2,3\*</sup> Cecilia Then Paulino MPH,<sup>4¶</sup> Renee Galloway, MPH<sup>5</sup> Michael de St. Aubin MD, MDes,<sup>1,3</sup> Helen J. Mayfield PhD,<sup>6</sup> Angela Cadavid Restrepo PhD,<sup>6</sup> Devan Dumas MPH,<sup>1,3</sup> Salome Garnier MPH,<sup>1,3</sup> Marie Caroline Etienne MD,<sup>1</sup> William Duke MD,<sup>7</sup> Farah Peña MD,<sup>4</sup> Naomi Iihoshi MS,<sup>1</sup> Gabriela Abdalla MS,<sup>1</sup> Beatriz Lopez MS,<sup>8</sup> Lucia de la Cruz MS,<sup>4</sup> Bernarda Henríquez MS,<sup>4</sup> Kara Durski PhD,<sup>1,3</sup> Margaret Baldwin BS,<sup>1,3</sup> Gideon Loevinsohn MD PhD,<sup>1,9</sup> Eleanor M. Rees PhD,<sup>11</sup> Beatris Martin,<sup>6</sup> Benn Sartorius PhD,<sup>6</sup> Ronald Skewes-Ramm MD,<sup>4</sup> Emily Zielinski Gutiérrez DrPH,<sup>8</sup> Adam Kucharski PhD,<sup>10</sup> Colleen L. Lau PhD<sup>¶¶</sup>

1 Brigham and Womens Hospital, Boston, MA, USA

2 Harvard Medical School, Boston, MA, USA

3 Harvard Humanitarian Initiative, Cambridge, MA, USA

4 Ministry of Health and Social Assistance, Santo Domingo, Dominican Republic

5 Centers for Disease Control and Prevention, Division of High-Consequence Pathogens and Pathology, Atlanta, USA

6 University of Queensland Centre of Clinical Research (UQCCR), University of Queensland, Brisbane, Australia

7 Pedro Henríquez Ureña National University, Santo Domingo, Dominican Republic

8 Centers for Disease Control and Prevention, Central America Regional Office, Guatemala City, Guatemala

9 Massachusetts General Hospital, Boston, USA

10 University of Glasgow, Glasgow, UK

11 London School of Hygiene & Tropical Medicine, London, UK

\* Corresponding author. Email: enilles@bwh.harvard.edu

¶ These authors contributed equally

### Abstract

Little is known about the epidemiology of leptospirosis in the Dominican Republic, the second most populous country in the Caribbean. We report on findings from a multi-stage household survey across two regions in the country that reveals a previously under-estimated burden of human *Leptospira* infection. Our findings, based on the reference-standard microscopic agglutination test, indicate a complex picture of serogroup diversity, spatial heterogeneity in infection and risk, and a marked discrepancy between reported cases and serologically estimated infections. Given an overall seroprevalence of 11.3% (95% CI: 10.8-13.0%) and a lower estimated force of infection (0.30% per year [0.27% - 0.35%]) the number of infections may exceed national reported case data by 145-fold or more. Icterohaemorrhagiae, associated with severe Weil's disease, was the most commonly identified serogroup with a serogroup-specific prevalence of 4.4%. Consistent with other settings, risk factors including age, male sex, and rat exposure were associated with higher seroprevalence. Our study highlights the need for targeted public health interventions informed by serogroup-specific dynamics, detailed spatial analyses, knowledge of local animal reservoirs, and strengthened laboratory surveillance to effectively control this pathogen.

### Background

Leptospirosis is a growing global health threat. The zoonotic disease, caused by *Leptospira* spirochetes, is transmitted to humans through direct exposure to infected animals or more commonly through contact with soil or water contaminated with urine from infected mammals. Globally, there are over one million yearly cases of leptospirosis and approximately 60,000 deaths.<sup>1</sup> While Asian and Oceanic nations have reported the highest incidence of the disease to date, leptospirosis has become the most widespread and

53 prevalent bacterial zoonotic disease globally, and its epidemiological reach spans tropical and subtropical  
54 areas, including many regions with limited laboratory diagnostics or well-established surveillance  
55 infrastructure.<sup>1,2</sup>

56  
57 The diagnosis of leptospirosis is challenging given its varied clinical presentations, ranging from  
58 asymptomatic or mild febrile infections to severe pulmonary hemorrhage and multi-organ failure, which  
59 overlap with the symptomatology of many tropical and subtropical diseases including dengue,  
60 chikungunya, typhoid, rickettsioses, and malaria. The accurate diagnosis relies on high clinical suspicion  
61 coupled with laboratory evidence of infection. While molecular tests have excellent test characteristics for  
62 the diagnosis of infection early in the disease course, they are costly and not widely available in many  
63 endemic settings including in the Dominican Republic, the location of the present study. The reference  
64 standard serologic assay is the microscopic agglutination test (MAT), that detects antibodies against  
65 leptospiral lipopolysaccharide. Anti-*leptospira* antibodies are generated within one week of infection and  
66 persist for up to eight years. While the utility of MAT is limited for the diagnosis of acute leptospirosis  
67 due to poor sensitivity early in the disease course, MAT provides valuable data on the presence of  
68 *leptospira* antibodies for population-based serological surveys.<sup>3,4</sup>

69  
70 Given the overlapping clinical features of leptospirosis and other common diseases, together with limited  
71 access to confirmatory testing, the burden and epidemiology of leptospirosis is poorly characterized in the  
72 Dominican Republic and the Caribbean more broadly.<sup>5</sup> Yet, despite this, the Caribbean region is known to  
73 have widespread endemic disease, has experienced numerous outbreaks, and reports among the highest  
74 estimated disease-specific mortality rates globally.<sup>1</sup> Regional risk factors for leptospirosis transmission  
75 include intensive farming and household livestock, as well as frequent extreme climactic events with  
76 excess precipitation and flooding, which are exacerbated by climate change and expected to increase.<sup>6,7</sup> In  
77 the present study, to inform public health planning and control efforts, we aimed to characterize the  
78 seroepidemiology of human *leptospira* infection among populations in two provinces in the Dominican  
79 Republic.

## 80 81 **Methods**

### 82 **Setting**

83 The Dominican Republic, a Caribbean nation with a population of almost 11 million residents, is an upper  
84 middle income Latin American country that shares the island of Hispaniola with Haiti. Case reports and  
85 outbreak investigations have documented case reports among returning travelers and intermittent surges  
86 in leptospirosis cases following tropical storms and hurricanes<sup>7,8</sup> The present study is set in the provinces  
87 of Espaillat and San Pedro de Macoris, selected to ensure spatial, ecological, and geographical  
88 heterogeneity. Espaillat Province, located in the northwest of the country (Northwest study region), has a  
89 population of about 260,000 residents with topography ranging from coastal plains to mountainous areas.  
90 The climate is tropical with annual rainfall of 1,300 mm, and a rainy season from June to November.  
91 Farming activities include coffee, cacao, and rice cultivation. San Pedro de Macoris Province has a  
92 population of about 420,000 and is a coastal province located in the southeast of the country, with  
93 topography characterized by a coastal plain that houses most of its population and economic activities  
94 (Southwest study region). The province is historically recognized as a center for sugar cane farming. It  
95 receives about 1,600 mm of rain annually, and is prone to tropical storms, particularly during the June to  
96 November rainy season.

### 97 98 **Study design, participant selection**

99 As previously described,<sup>9</sup> between June 30 and Oct 10, 2021, we conducted a three-stage cross-sectional  
100 national household serological survey and enrolled 6,683 participants from 3,832 households in 134

101 clusters across all 32 provinces nationally. Briefly, to maximize spatial distribution we used grid- and  
102 satellite-image based methods to select clusters and 60 households within each cluster.<sup>10</sup> Household  
103 members aged  $\geq 5$  years old present in the home at the time of the serosurvey were invited to participate.  
104 The present study is a nested analysis of 23 clusters in Espaillat (n=10) and San Pedro de Macoris  
105 provinces (n=13). These provinces were intentionally oversampled during the national survey to allow for  
106 more granular provincial analyses.

#### 107 **Informed consent and ethical approvals**

108 Written consent was obtained for all participants. For children <18 years old, except emancipated minors,  
109 consent was obtained from the legal guardian. Written assent was provided by adolescents 14-17 years  
110 old, and verbal assent by children 7-13 years old. The study protocol was approved by the National  
111 Council of Bioethics in Health, Santo Domingo (013-2019), the Institutional Review Board of Pedro  
112 Henríquez Ureña National University, Santo Domingo, and the Mass General Brigham Human Research  
113 Committee, Boston, USA (2019P000094). Study procedures and reporting adhered to STROBE criteria  
114 for observational studies.

#### 116 **Study procedures**

117 Questionnaires were administered to all study participants by trained enumerators using the KoBo  
118 Toolbox data collection platform ([www.kobotoolbox.org](http://www.kobotoolbox.org)) on electronic tablets to collect self-reported  
119 demographics (age, gender, race-ethnicity), education, primary occupation, work location (indoors,  
120 outdoors, or a mix), rural vs. urban residence, residence in a barrio (settlement), and seeing rats in their  
121 residence. Venous blood was collected from all participants, processed as sera, and frozen at  $-80^{\circ}\text{C}$ .

#### 123 **Immunoassay characteristics**

124 MATs were used to detect anti-*Leptospira* antibodies, and determine the putative serogroups associated  
125 with infections. Serological analyses were performed at the US CDC's Zoonoses and Select Agent  
126 Laboratory, Bacterial Special Pathogens Branch, Atlanta, USA. A panel of 20 pathogenic serovars  
127 comprising 17 serogroups were selected for the MAT panel (**Table S1**), and samples were tested at  
128 dilutions from 1:100 to endpoint. MAT titers  $\geq 1:100$  were considered seropositive and indicative of prior  
129 infection,

#### 131 **Data sources**

132 National and provincial demographic data including cluster population and classification (urban versus  
133 rural) were provided by the Dominican Republic National Statistics Office and the United Nations  
134 Statistics Division.<sup>11,12</sup> Data on national reported leptospirosis cases was from the Pan American Health  
135 Organization (PAHO) Core Indicator Dashboard from data generated by the General Epidemiology  
136 Directorate of the Ministry of Public Health and Social Assistance. Leptospirosis is a reportable disease in  
137 the Dominican Republic. Other data were enumerated during the study.

#### 139 **Classification and statistical analysis**

140 Given cross-reactivity between serovars, particularly those in the same serogroup, analyses were  
141 performed on the serogroup level. For samples that reacted to multiple serogroups, the serogroup  
142 associated with the highest titer was considered to be the primary reacting serogroup. Samples that  
143 registered the same highest titer across two or more serogroups were recorded as 'mixed' (i.e. reacting to  
144 multiple serogroups). Serogroups with less than ten sero-reactive samples were aggregated and reported

146 as ‘other.’ Adjusted seroprevalence estimates were weighted for sampling design (selection probability,  
147 clustering), corrected for finite population, and post-stratified for age group and sex using methods  
148 previously described.<sup>13</sup>

149  
150 To assess risk factors for infection, logistic regression analysis was performed with serostatus as the  
151 dependent binary variable, with only those variables with p-value <0.05 on univariable analysis retained  
152 for the multivariable models. Explanatory variables explored in the models were age category, gender,  
153 study region, setting, occupation, and frequent contact with rats. To explore serogroup-specific risks, we  
154 used the same models but adjusted the dependent variable to represent only those individuals with the  
155 highest titer to the relevant serogroup as the serogroup-specific seropositives, with all others representing  
156 the serogroup-specific seronegatives.

157  
158 Serocatalytic models were used to estimate the annual force of infection (FOI) from serological survey. A  
159 catalytic model (model 1), which assumes there is a lifelong constant FOI, and a reverse catalytic model  
160 (model 2a), which assumes that antibody prevalence declines over time, were fitted to the serological  
161 survey. In addition, a third model (model 2b) which is a reverse catalytic model which assumes no  
162 transmission for the six years prior to the serosurvey was also explored. A uniform distribution between 0  
163 and 0.5 (corresponding to a yearly attack rate between 0 and 39%) was used for the FOI. Informed priors  
164 were used for the rate of waning with a distribution mean of 0.14 which corresponds to a duration of  
165 antibody body positivity of ~7 years and is informed based on previous estimates (**Table S2**).<sup>3</sup>

166  
167  
168 Analyses and data visualization were performed using the R statistical programming language (R version  
169 4.2.3, 2023-03-01),<sup>14</sup> with the *RANN* package for cluster and household selection,<sup>15</sup> the *survey* package  
170 for the analysis of complex survey samples,<sup>16</sup> *finalfit* (glm) for logistic regression,<sup>17</sup> *mcmc* for partial effect  
171 analysis, and *ggplot2* for data visualization.<sup>18</sup>

172

## 173 **Results**

174 Of 2,124 participants enrolled in the two study provinces during the national serosurvey, 2,091 samples  
175 (98.4%) were tested for evidence of prior leptospirosis infection using MAT and comprise the current  
176 study population. The median age was 39 years (IQR 22, 56) and 1,339 were female (64.0%).

177 Demographic details are listed in **Table 1**. A total of 237 study participants registered agglutinating  
178 antibodies, assessed by the presence of MAT titers  $\geq 1:100$ , for an overall unadjusted seroprevalence of  
179 11.3% (95% confidence interval: 10.0-12.7%) and an adjusted seroprevalence of 11.3% (10.8-13.0%).

180

181 Serocatalytic models estimated the annual attack rate in the Dominican Republic to be 0.30% (0.27 -  
182 0.35%) using the catalytic model (model 1) which assumes a constant FOI and no waning immunity, and  
183 1.00% (0.70% - 1.69%) for the reverse catalytic model (model 2a) which assumes a constant FOI whilst  
184 allowing for waning immunity. The catalytic model (model 1) fitted the data better compared with the  
185 reverse catalytic model (model 2a), with a DIC difference of 31. A third model, which was the reverse  
186 catalytic model but assumed there was no transmission in the six years prior to the serosurvey (model 2b),  
187 fitted the data better compared with model 2a (DIC difference 16), with an estimated annual attack rate of  
188 1.19% (0.90 - 0.17%) (**Table S2; Fig S1**). Using data from these models, we estimated the number of  
189 annual leptospirosis infections and assessed the gap between reported cases and serologically inferred  
190 infections. Using the lowest estimated FOI (0.30%) applied to the population of the Dominican Republic  
191 (~11 million), we infer about 33,000 infections per year which is approximately 145-fold higher than the  
192 average number of nationally reported cases between 2013 and 2022 (226 cases per year) (**Table S3**). If

193 we consider the highest estimated FOI (1.19%), the ratio of reported to serologically estimated cases is  
194 approximately 1:580. While the spatial heterogeneity of leptospirosis transmission necessitates caution  
195 when extrapolating from two provinces to the entire country, when considering only the two study  
196 provinces (population ~680,000) we estimate 2,040 annual leptospirosis cases assuming a FOI of 0.30%  
197 and 8,092 cases assuming a FOI of 1.19%. In turn, this suggests that there may be between nine and 36-  
198 fold more leptospirosis infections in just the two study provinces than reported cases across the entire  
199 country.

200  
201 Seropositive results were reported for 16 of the 20 serovars included in the MAT panel, which included  
202 14 of 17 serogroups. Among the 237 seropositive individuals, 91 (38.4%) registered the highest titers to  
203 *L. interrogans* serogroup Icterohaemorrhagiae, 38 to Australis (16.0%), 25 to Canicola (10.5%), 20 to  
204 Djasiman (8.4%), and 12 to *L. santarosai* serogroup Pyrogenes (5.1%) (**Fig 1, Table 2, Table S1**). The  
205 four most common serogroups accounted for 73.4% of seropositive results. Among 27 (11.4%)  
206 individuals that registered highest titers against two or more serogroups (i.e. Mixed serogroups), the  
207 mostly commonly reacting serogroups were Icterohaemorrhagiae (23, 85.2%), Canicola (14, 51.9%), and  
208 Australis (12, 28.6%).

209  
210 Analysis of leptospirosis seroprevalence across demographic and environmental factors identified distinct  
211 trends (**Fig 2, Table S4**). Increasing age was associated with higher seropositivity, with the  
212 seroprevalence of 2.8% among those 5–19 years, 13.7% among those 35-49 years, and 19.3% among  
213 those 65 years and older. Similarly, multivariable adjusted odds ratios demonstrated a sharp increase in  
214 seroprevalence during early adulthood, followed by a plateau in middle age and then a subsequent  
215 increase in older age (**Fig 2**). Seropositivity was higher among males (17.8%) than females (7.7%)  
216 (adjusted Odds Ratio 2.41 [95% confidence interval 1.79-3.25]), among residents of the Northwest  
217 (15.7%) versus Southeast Region (8.6%) (aOR 1.84, 1.31-2.58), and among those reporting frequently  
218 seeing rats in the household (aOR 1.64 [1.06-2.52]). While being a farmer was associated with high  
219 seroprevalence (35.1%) with an unadjusted odd ratio of 4.67 (2.80-7.63) vs non-professionals, no  
220 association was identified on multivariable analysis (aOR 1.63 [0.94-2.80]). Similarly, residing in a rural  
221 vs urban setting was associated with higher odds of seropositivity on univariable (OR 1.61 [1.22-2.11])  
222 but not multivariable analysis. Residing in a barrio (settlement) and indoor versus outdoor work were not  
223 associated with leptospirosis serostatus.

224  
225 Given the distinct host and ecological features of different *Leptospira* serogroups, we examined serogroup  
226 specific demographic and environmental risks. Analyzing serogroup-specific seroprevalence for the most  
227 common serogroups (Icterohaemorrhagiae, Australis, and Canicola) identified similar overall  
228 seroprevalence trends across demographic and environmental factors (**Fig 2, Tables S4-S8**). However,  
229 there were exceptions. Males registered higher seropositivity (vs females) against serogroup  
230 Icterohaemorrhagiae (aOR 2.69 [1.71-4.26]) but not Australis (aOR 1.14 [0.51-2.41]) or Canicola (aOR  
231 1.44 [0.59-3.34]). Serogroup Australis was associated with higher seroprevalence among farmers (aOR  
232 5.55 [2.03-14.98]) versus the reference group, but not Icterohaemorrhagiae or Canicola.  
233 Icterohaemorrhagiae and Canicola serogroups were both associated with higher seroprevalence in the  
234 Northwest study region (aOR 2.82 [1.65-4.99] and 3.24 [1.23-9.37] respectively), but not Australis.  
235 Lastly, Icterohaemorrhagiae and Canicola seroprevalence was higher in rural vs urban setting (aOR 1.62  
236 [1.02-2.61] and 2.1 [1.0-4.7] respectively) but trended lower for Canicola (aOR 0.57 [0.23-1.35]). When

237 excluding individuals that were seropositive to serogroups other than the serogroup of interest (e.g. when  
238 assessing risk factors for serogroup Icterohaemorrhagiae, all seropositive individuals with highest titer to  
239 non-Icterohaemorrhagiae serogroups were excluded from the analysis) risk factors and odds ratios were  
240 essentially unchanged.

241  
242 Given the unusual age distribution of seroprevalence, with the highest rates among the older population  
243 rather than the common pattern of peaking in middle age and then either plateauing or declining in older  
244 age,<sup>19,20</sup> we examined the age distribution in more detail, stratifying by study region, gender, and urban  
245 vs. rural setting. We found that the trend of increasing seroprevalence with age was consistent across all  
246 variables, except for female gender, which showed a biphasic curve with peaks in middle age and again in  
247 older age (**Fig. 3**). Similar trends by age group were observed when examining gender-specific  
248 seroprevalence in the Northwest vs. the Southeast region (**Fig S2**). To further assess this finding, we used  
249 GAMs to model seroprevalence by age and gender, while accounting for documented or potential  
250 confounding covariates such as study region, work environment, residence in a barrio (settlement), and  
251 urban vs. rural residence. The model aligned with the unadjusted analyses showing females with a  
252 biphasic age-associated seroprevalence distribution and males with a near-linear increase in  
253 seroprevalence with age (**Fig. S3**).

## 254 255 **Discussion**

256 This multistage household survey based on a carefully sampled population across two discrete study  
257 regions provides new insights into the epidemiology of human *Leptospira* infection in the Dominican  
258 Republic. Our findings suggest a wide diversity of circulating serogroups, regional variation in  
259 transmission, and a marked difference between national reported cases and infections.

260  
261 Discerning the true extent of leptospirosis infections is challenging, particularly in most endemic setting  
262 where access to testing is limited. Accordingly, population-based serological studies are valuable for  
263 characterizing the burden of *Leptospira* infections. In this study we used serological data to estimate the  
264 annual attack rate and in turn the difference between nationally reported leptospirosis cases and  
265 serologically estimated infections. Our findings suggest marked under ascertainment with 100-fold or  
266 greater difference in reported versus estimated cases. While our estimates vary based on the modeling  
267 approach it appears clear that only a small fraction of infections are captured through existing reporting  
268 mechanisms. The application of serocatalytic methods to estimate leptospirosis FOI and, in turn, under  
269 ascertainment has only been reported once.<sup>3</sup> In that study, based on data from a national serological  
270 survey in Fiji, the ratio of reported cases to estimated infections ranged from about 1:28 to 1:140. While  
271 surveillance infrastructure and criteria for reporting leptospirosis cases varies markedly between  
272 countries, thus making direct comparisons challenging, our findings support the concept that under-  
273 ascertainment of *Leptospira* infections in many endemic settings is likely on the order of magnitudes.

274  
275 While Icterohaemorrhagiae, Australis, Canicola, and Djasiman were collectively implicated as the  
276 infecting serogroups in almost three quarters of cases, our study suggests high diversity with 14 of the 17  
277 serogroups included in our panel identified as the primary infecting serogroup, similar to Trinidad where  
278 17 serovars have been isolated from humans.<sup>21</sup> This is in contrast to some other island settings such as  
279 Barbados where only three serovars of *Leptospira interrogans* have been identified, or Fiji where a single  
280 serovar (Pohnpei) was implicated in over 80% of seropositive cases identified through a national

281 serological survey.<sup>21,22</sup> We examined both the overall epidemiology of human *Leptospira* infection and  
282 the epidemiology of the three most common serogroups: Icterohaemorrhagiae, Australis, and Canicola.  
283 Icterohaemorrhagiae, primarily transmitted by exposure to rat urine, was the most commonly identified  
284 serogroup. Given Icterohaemorrhagiae is considered to cause the most severe clinical disease, including  
285 Weil's Disease which is characterized by hepatic and renal failure and high case-fatality rates, it is of  
286 particular public health importance.<sup>23</sup> The primary reservoirs for Icterohaemorrhagiae are the *Rattus*  
287 *norvegicus* (or brown rat) and *Rattus rattus* (Black rat), while other rodents including mice and voles may  
288 be involved in transmission. Australis and Canicola serogroups are usually associated with milder clinical  
289 disease, although severe disease and deaths have been reported. The primary reservoirs for the Australis  
290 serogroup include various wild and domestic animals, such as farm animals, rats, and mice. Dogs are the  
291 major recognized reservoir for the Canicola serogroup, although livestock and wild mammal are other  
292 potential reservoirs.<sup>24</sup>

293  
294 Similar to studies on the epidemiology of leptospirosis from other settings, we confirmed that being male,  
295 being exposed to rats in the home, and older age were associated with higher seroprevalence.<sup>19</sup> We found  
296 that the prevalence of *Leptospira* antibodies increased through middle age and then plateaued, a typical  
297 finding that reflects the increased occupational risk of infection among young and middle aged adults.  
298 However, we also observed an increase in the oldest age groups, particularly among males, a somewhat  
299 unusual trend given reported infection rates generally decline among older age groups,<sup>1</sup> with  
300 seroprevalence typically remaining flat or declining during late adulthood.<sup>19</sup> Given antibodies to  
301 *Leptospira* decay over time and are thought to be detectable for only about eight years post-infection,<sup>3,25</sup>  
302 the older population would be anticipated to register declining seroprevalence in the absence of ongoing  
303 exposures. The reason that this was not the case suggests unexpectedly high ongoing transmission among  
304 older adults, although why age-specific transmission would be different in this versus other settings is  
305 unclear. We further explored age-specific seroprevalence stratifying by gender, study region and urban vs  
306 rural setting and found interesting differences, particularly between males and females. Males  
307 demonstrated a near linear increase in seroprevalence with age while females demonstrated a distinct  
308 biphasic pattern with peaks around early middle-age and again after 70 years of age. The reason for these  
309 differences by gender is unclear and the few studies that have reported *Leptospira* seroprevalence  
310 stratified by both age and gender (or sex) contrast with our findings, although those studies were either  
311 limited by size<sup>26</sup> or from markedly different settings.<sup>19</sup> We also found differences by study region, with  
312 seroprevalence in the Northwest Region (Espaillat) about 1.8-fold higher than the Southeast Region (San  
313 Pedro de Macoris) even after adjusting for potential confounders, highlighting distinct spatial  
314 heterogeneity in leptospirosis transmission. However, there are nuances to these findings, and there were  
315 differences in serogroup-specific risks that were not identified when assessing risks aggregated across all  
316 serogroups. Given differences in mammal reservoirs across serogroups, and therefore differences in  
317 exposure risks and transmission pathways, this may be anticipated. For example, adjusted serogroup  
318 Australis seroprevalence was about five-fold higher among farmers than the reference group, but not  
319 higher for Icterohaemorrhagiae or Canicola. This likely reflects the fact that livestock is a common  
320 reservoir for the Australis serogroup but less so for Icterohaemorrhagiae and Canicola. Similarly, the  
321 adjusted odds of being seropositive for Icterohaemorrhagiae was almost three-fold higher for males than  
322 females, while no gender differences were identified for serogroups Australis and Canicola. These data  
323 highlight how serogroup-specific risks may be leveraged to prioritize targeted public health measures  
324 such as rodent control or livestock and dog vaccination.<sup>27</sup>

325  
326 While our study has multiple strengths including a relatively large population selected using a multilevel  
327 sampling approach, testing of samples using the reference-standard serological assay, and sampling across  
328 two discrete regions to understand geographic variations, there are some limitations. First, the geographic  
329 scope is limited to two out of 34 provinces, potentially restricting the generalizability of our findings  
330 across other regions of the country. Second, cross-reactivity may affect the accuracy of our serogroup-  
331 specific analyses. However, when we excluded seropositive individuals with highest titer against a  
332 serogroup other than the one being assessed, findings were essentially unchanged. Third, while some  
333 studies use an MAT titer cutoff of 1:50, we used a titer cutoff of 1:100 and therefore our estimated  
334 seroprevalence was likely lower than if a lower cutoff was used. Fourth, self-reported exposures and  
335 socio-demographics factors enumerated through our survey may be subject to recall or social desirability  
336 biases. Fifth, serogroup specific analyses were limited by the number of seropositive individuals,  
337 particularly for serogroups Australis and Canicola. Lastly, this was a cross-sectional study and therefore  
338 we were not able to capture temporal transmission dynamics.

339  
340 In conclusion, this seroepidemiological study provides insights into the epidemiology and under-reported  
341 burden of human *Leptospira* infection in the Dominican Republic. We identified a range of serogroups,  
342 geographic variation in infection and risk factors, and a substantial discrepancy between reported and  
343 likely cases. While seroprevalence is high, risks varied markedly by age, gender, and study region.  
344 Analyzing serogroups individually identified distinct transmission patterns, emphasizing the importance  
345 of understanding transmission pathways to ensure targeted and effective public health interventions. Our  
346 findings highlight the complex epidemiology of leptospirosis in the Dominican Republic, underlining the  
347 need for more granular investigation into environmental factors, animal reservoirs, and serovar-specific  
348 dynamics to effectively control this pathogen.

### 349 350 **Acknowledgments**

351 This study was funded by the US CDC (U01GH002238). We would like to thank the many study  
352 participants that volunteered to participate in this study. We would also like to thank the study staff that  
353 collected the field data, the Dominican Republic Ministry of Health and Social Assistance, and the Pedro  
354 Henriquez Ureña National University, for their commitment and support for the study.

### 355 356 **Declarations of interests**

357 E.J.N. is the PI on a US CDC funded U01 award that funded the study, and C.L.L., A.K., D.D., M.d.S.A.,  
358 A.C.R., H.M., S.G., M.C.E., W.D., N.I., G.A., B.H., K.D., M.B. have received salaries, consultancy fees,  
359 or travel paid through this award. E.Z.G., B.L. are employees of the US CDC. B.H., C.T., L.C., F.P., and  
360 R.S.-R. are employees of the Ministry of Ministry of Health and Social Assistance, Dominican Republic,  
361 that was subcontracted with funds from the US CDC award. A.K is supported by the Wellcome Trust,  
362 UK. CLL is supported by the Australian National Health and Medical Research Council. CDC staff  
363 supported the design and manuscript editing. We declare no other competing interests.

364  
365  
366  
367  
368  
369



370 **Tables and figures**

371  
372 **Table 1.** Characteristics of study population and *Leptospira* seroprevalence by microscopic agglutination test, Espaillat and San  
373 Pedro de Macoris Provinces, Dominican Republic, 2021

| Population characteristic        | N    | No. seropositive | Seroprevalence - unadjusted Percent (95% CI) | Seroprevalence - adjusted Percent (95% CI) |
|----------------------------------|------|------------------|----------------------------------------------|--------------------------------------------|
| <b>Overall</b>                   | 2091 | 237              | 11.3 (10.0, 12.7)                            | 11.3 (10.8, 13.0)                          |
| <b>Gender</b>                    |      |                  |                                              |                                            |
| Female                           | 1339 | 103              | 7.7 (6.3, 9.2)                               | 8 (6.8-9.3)                                |
| Male                             | 736  | 131              | 17.8 (15, 20.7)                              | 15.9 (12.9-19.2)                           |
| Other                            | 16   | 3                | 18.8 (0.5, 42.6)                             | 9.8 (5.6-15.6)                             |
| <b>Age category, years</b>       |      |                  |                                              |                                            |
| 5-19                             | 395  | 11               | 2.8 (1.2, 4.4)                               | 4.2 (2.4, 7.1)                             |
| 20-34                            | 531  | 51               | 9.6 (7.1, 12.1)                              | 12.6 (9.8, 16.0)                           |
| 35-49                            | 461  | 63               | 13.7 (10.5, 16.8)                            | 10.7 (4.6, 23.0)                           |
| 50-64                            | 393  | 52               | 13.2 (9.9, 16.6)                             | 16.1 (14.1, 18.4)                          |
| 65+                              | 311  | 60               | 19.3 (14.9, 23.7)                            | 19.4 (15.6, 23.9)                          |
| <b>Study region</b>              |      |                  |                                              |                                            |
| Northwest (Espaillat)            | 811  | 127              | 15.7 (13.3, 18.3)                            | 14.9 (13.9-15.9)                           |
| Southeast (San Pedro de Macoris) | 1280 | 110              | 8.6 (7.1, 10.1)                              | 7.1 (4.1-11.1)                             |
| <b>Setting</b>                   |      |                  |                                              |                                            |
| Rural                            | 911  | 128              | 14.1 (11.8, 16.3)                            | 13.6 (7.3-22.1)                            |
| Urban                            | 1180 | 109              | 9.2 (7.6, 10.9)                              | 11.5 (8.1-15.6)                            |
| <b>Reside in barrio</b>          |      |                  |                                              |                                            |
| No                               | 1527 | 173              | 11.3 (9.8, 13.0)                             | 11.6 (9.7-13.8)                            |
| Yes                              | 541  | 62               | 11.5 (9.0, 14.4)                             | 13.7 (11.3-16.6)                           |
| <b>Work setting</b>              |      |                  |                                              |                                            |
| Indoor                           | 175  | 25               | 14.3 (9.6, 19.9)                             | 10.6 (3.7-22.1)                            |
| Outdoor                          | 92   | 20               | 21.7 (14.1, 30.9)                            | 21.5 (6.4-45.4)                            |
| Mix                              | 290  | 50               | 17.2 (13.1, 21.8)                            | 14.2 (9.4-20.2)                            |
| <b>Education</b>                 |      |                  |                                              |                                            |
| No formal                        | 208  | 43               | 20.7 (15.7, 26.7)                            | 21.0 (17.6-24.7)                           |
| Primary                          | 627  | 104              | 16.6 (13.9, 19.7)                            | 21.2 (17.5-25.3)                           |
| Secondary                        | 772  | 66               | 8.5 (6.7, 10.7)                              | 7.9 (5.5-11.1)                             |
| Technical                        | 44   | 5                | 11.4 (4.8, 24.6)                             | 18.3 (11.9-27.0)                           |
| University                       | 204  | 15               | 7.4 (4.4, 24.6)                              | 5.7 (1.5-19.5)                             |
| <b>Occupation</b>                |      |                  |                                              |                                            |
| Farmer                           | 74   | 26               | 35.1 (24.8, 46.5)                            | 37.0 (22.9-52.8)                           |
| Housewife/husband                | 562  | 54               | 9.6 (7.3, 12.2)                              | 11.8 (9.6-14.3)                            |
| Non-professional                 | 185  | 29               | 15.9 (11.0, 21.6)                            | 9.9 (3.5-20.7)                             |
| Professional                     | 73   | 9                | 12.3 (6.0, 21.2)                             | 9.3 (0.6-37.7)                             |
| Retired                          | 64   | 14               | 21.9 (12.9, 33.1)                            | 26.6 (15.2-40.6)                           |
| Student                          | 420  | 13               | 3.1 (1.7, 5.0)                               | 4.3 (2.3-7.2)                              |
| Other                            | 713  | 92               | 12.9 (10.6, 15.5)                            | 13.1 (11.6-14.6)                           |
| <b>Contact with rats</b>         |      |                  |                                              |                                            |
| No                               | 1757 | 196              | 11.2 (9.7, 12.7)                             | 12.2 (10.7-13.7)                           |
| Yes                              | 332  | 41               | 12.3 (9.0, 16.2)                             | 10.6 (7.4-14.4)                            |

374 Missing data includes 25 for Reside in barrio (adjusted seroprevalence 7.6% (6.3-8.8)), and two for Contact with rats. Work  
375 environment enumerated for active workers and excluded students, housepersons, retirees and unemployed (adjusted prevalence  
376 for excluded: 10.8% (9.1-12.6)). No values were missing for other covariates. Adjusted seroprevalence weighted for study design  
377 (selection probability, clustering), finite population correction, and post-stratified for age and sex. Seropositive defined as  
378 reactive on MAT  $\geq 1:100$ .  
379

380  
381  
382 **Table 2.** Prevalence of positive *Leptospira* microscopic agglutination tests by primary reacting serogroup, Espaillat and  
383 San Pedro de Macoris Provinces, Dominican Republic, July-Oct 2021

| Serogroup           | No. seropositive | Prevalence, % | Proportion of seropositives, % |
|---------------------|------------------|---------------|--------------------------------|
| Icterohaemorrhagiae | 91               | 4.35          | 38.4                           |
| Australis           | 38               | 1.82          | 16.0                           |
| Mixed               | 27               | 1.29          | 11.4                           |
| Canicola            | 25               | 1.20          | 10.5                           |
| Djasiman            | 20               | 0.96          | 8.4                            |
| Pyrogenes           | 12               | 0.57          | 5.1                            |
| Pomona              | 5                | 0.24          | 2.1                            |
| Ballum              | 4                | 0.19          | 1.7                            |
| Tarassovi           | 4                | 0.19          | 1.7                            |
| Bataviae            | 3                | 0.14          | 1.3                            |
| Seroje              | 3                | 0.14          | 1.3                            |
| Mini                | 2                | 0.10          | 0.8                            |
| Autumnalis          | 1                | 0.05          | 0.4                            |
| Celledoni           | 1                | 0.05          | 0.4                            |
| Cynopteri           | 1                | 0.05          | 0.4                            |
| Hebdomadis          | 0                | 0.00          | 0.0                            |
| Grippotyphosa       | 0                | 0.00          | 0.0                            |
| Javanica            | 0                | 0.00          | 0.0                            |
|                     | <b>237</b>       | <b>11.3</b>   | <b>100</b>                     |

384 Primary reacting serogroup is defined as the serogroup that registered the highest MAT titer for each seropositive study  
385 participant (N = 2,091). Individuals that registered the same highest titer to two or more serogroups are categorized as 'Mixed.'  
386 Seropositive defined as  $\geq 1:100$  titers using the MAT. Prevalence of serovars, species, and strains presented in Table S3.

387  
388  
389  
390  
391  
392  
393

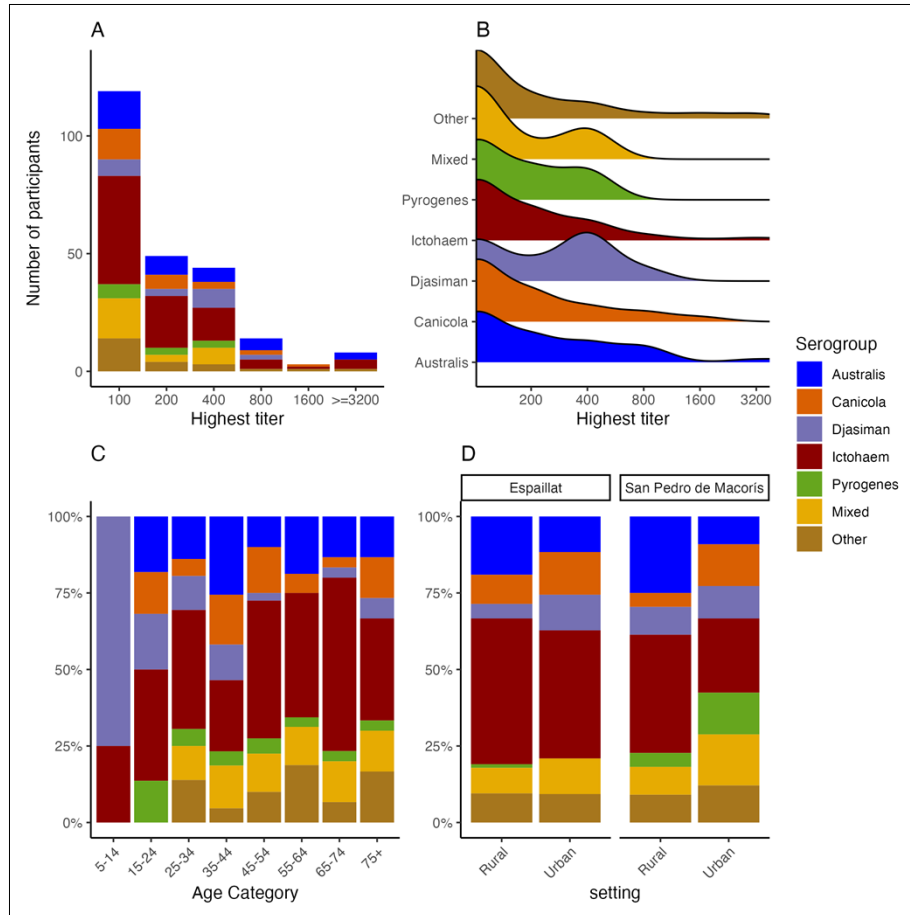

394  
 395 **Figure 1. Distribution of *Leptospira* serogroups by highest titer, age and study setting, Dominican Republic, 2021.** (A) Bar  
 396 plot indicates the number of participants stratified by the highest MAT titer and serogroup. (B) Ridge plot shows the distribution  
 397 of MAT titers for each serogroup. (C) Stacked bar plot indicates the distribution of serogroups by age group. (D) Distribution of  
 398 serogroups stratified by urban vs rural setting and Northwest (Espailat) vs Southeast (San Pedro de Macoris) regions. Serogroup  
 399 is defined as the serogroup that registered the highest MAT titer for each seropositive study participant. Individuals that  
 400 registered the same highest titer to two or more serogroups are categorized as 'Mixed.' N = 237 for all plots. Serogroups  
 401 aggregated as 'Other' are those with counts less than 10, with details listed in **Table S1**.  
 402

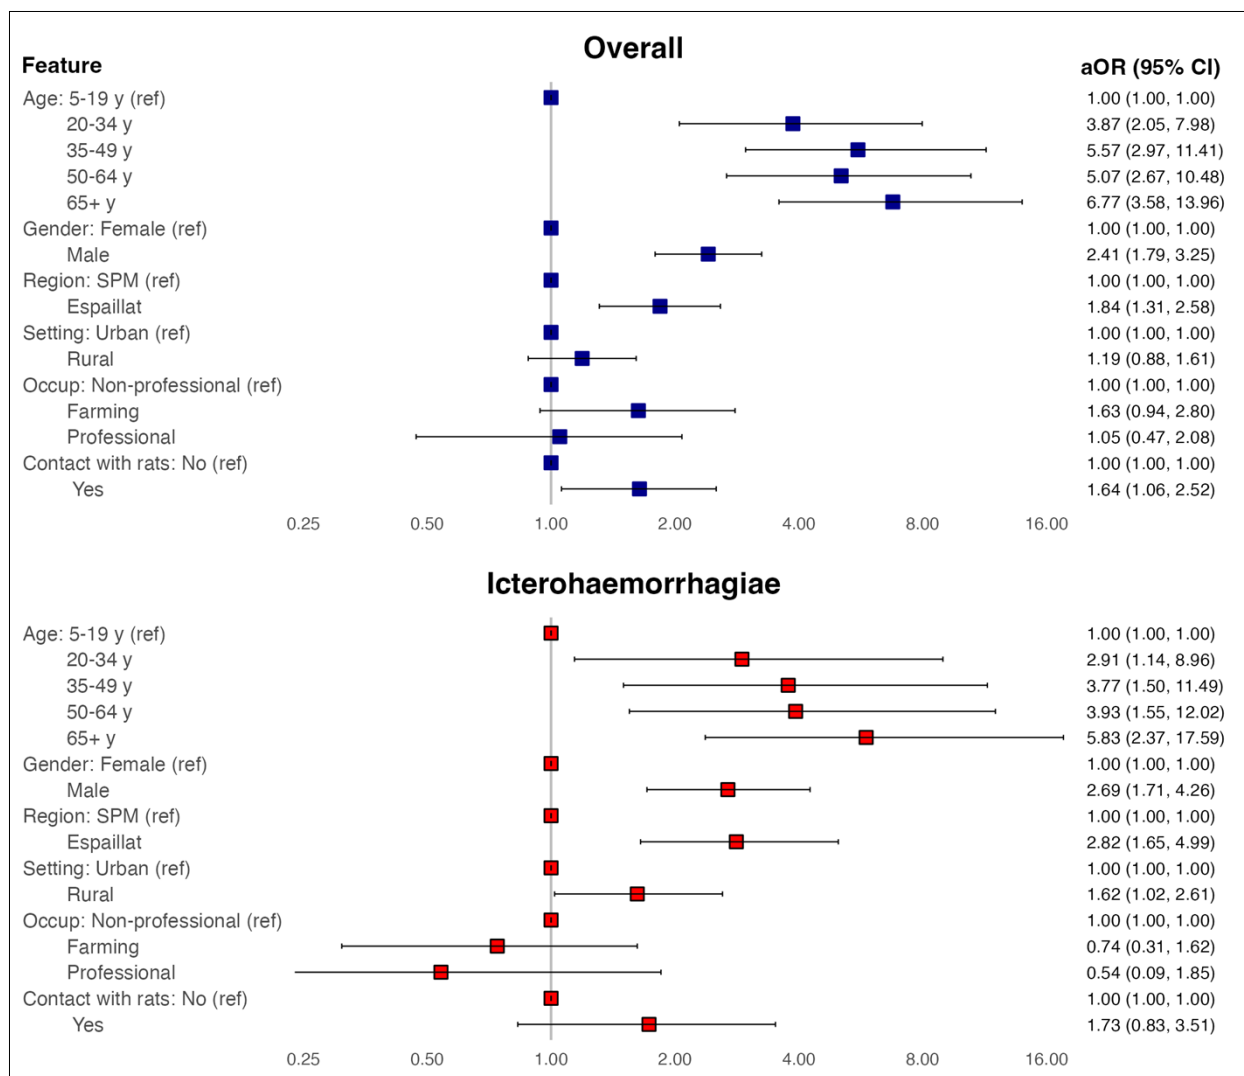

**Figure 2. Risk factors for *Leptospira* seropositivity by microscopic agglutination test in the Dominican Republic, 2021.**

Multivariable logistic regression with all modeled covariates shown. Serogroups Australis and Canicola not presented given limited number of seropositive individuals (N=38 and 25 respectively). Full model outputs including univariable odds ratios and model metrics shown in **Tables S4-S5**. SPM, San Pedro de Macoris (Southeast study region). Españolat (Northwest study region).

403  
404  
405  
406  
407  
408  
409  
410  
411  
412  
413  
414  
415  
416  
417  
418  
419  
420

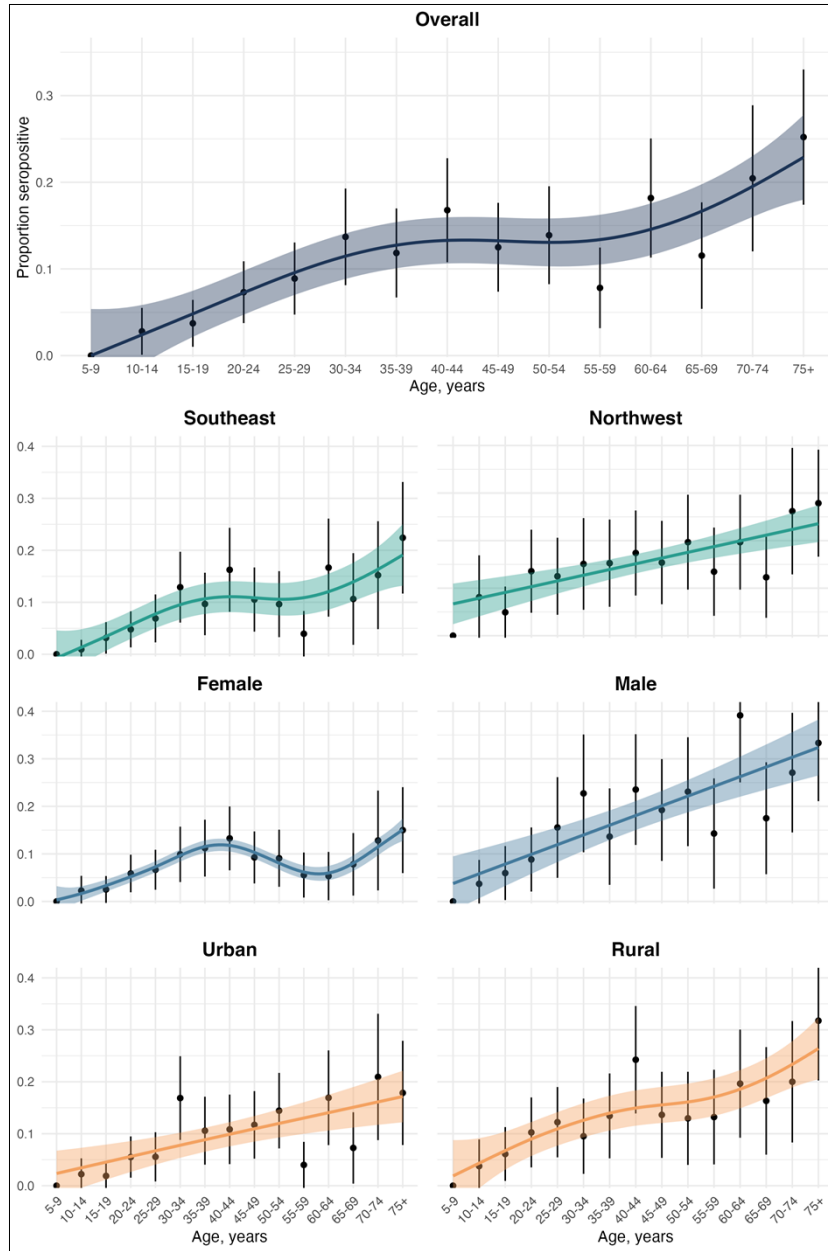

421  
422 **Figure 3. Age-stratified seroprevalence by region, gender and urban vs. rural setting.** Individual plots show seroprevalence  
423 point estimates (black dots) and 95% confidence intervals (black vertical lines) by five-year age group. A smoothed line is fitted  
424 to the data using generalized additive models with a cubic spline and weighted for number of observations. Colored ribbons  
425 represent the 95% CI. Number of observations per plot listed in Table 1. Southeast study region (San Pedro de Macoris  
426 province). Northwest study region (Español province). Additional plots showing age stratified seroprevalence by both gender  
427 and study region are presented in supplementary data **Fig S4**.  
428  
429  
430  
431  
432  
433  
434  
435

## 436 References

- 437 1. Costa F, Hagan JE, Calcagno J, et al. Global Morbidity and Mortality of Leptospirosis: A Systematic  
438 Review. *PLoS Negl Trop Dis*. 2015;9(9):0-1. doi:10.1371/journal.pntd.0003898
- 439 2. Torgerson PR, Hagan JE, Costa F, et al. Global Burden of Leptospirosis: Estimated in Terms of Disability  
440 Adjusted Life Years. *PLoS Negl Trop Dis*. 2015;9(10):1-14. doi:10.1371/journal.pntd.0004122
- 441 3. Rees EM, Lau CL, Kama M, Reid S, Lowe R, Kucharski AJ. Estimating the duration of antibody positivity  
442 and likely time of *Leptospira* infection using data from a cross-sectional serological study in Fiji. *PLoS Negl*  
443 *Trop Dis*. 2022;16(6):1-18. doi:10.1371/JOURNAL.PNTD.0010506
- 444 4. Palaniappan RU, Ramanujam S, Chang Y-F. Leptospirosis: pathogenesis, immunity, and diagnosis. *Curr*  
445 *Opin Infect Dis*. 2007;20(3):284-292. doi:10.1097/QCO.0b013e32814a5729
- 446 5. Peters A, Vokaty A, Portch R, Gebre Y. Leptospirosis in the Caribbean: a literature review. *Rev Panam*  
447 *Salud Pública*. 2017;1-9. doi:10.26633/rpsp.2017.166
- 448 6. Pappas G, Papadimitriou P, Siozopoulou V, Christou L, Akritidis N. The globalization of leptospirosis:  
449 worldwide incidence trends. *Int J Infect Dis*. 2008;12(4):351-357. doi:10.1016/j.ijid.2007.09.011
- 450 7. Grobusch MP, Bollmann R, Schönberg A, et al. Leptospirosis in travelers returning from the Dominican  
451 Republic. *J Travel Med*. 2003;10(1):55-58. doi:10.2310/7060.2003.30683
- 452 8. Mota C, Fernandez J, G G, et al. Outbreak of Leptospirosis in Children After Tropical Storm in the  
453 Dominican Republic. *Int J Infect Dis*. 2008;12(1):334-335. doi:https://doi.org/10.1016/j.ijid.2008.05.894
- 454 9. Nilles EJ, Paulino CT, de St. Aubin M, et al. SARS-CoV-2 seroprevalence, cumulative infections, and  
455 immunity to symptomatic infection – A multistage national household survey and modelling study,  
456 Dominican Republic, June–October 2021. *Lancet Reg Heal - Am*. 2022;16(November):100390.  
457 doi:10.1016/j.lana.2022.100390
- 458 10. Diggle P, Lophaven S. Bayesian geostatistical design. *Scand J Stat*. 2006;33(1):53-64.  
459 doi:doi.org/10.1111/j.1467-9469.2005.00469.x
- 460 11. Oficina Nacional de Estadística. <https://www.one.gob.do/>. Accessed May 21, 2023.
- 461 12. United Nations Statistic Division. *Global Demographics*; 2017. [https://unstats.un.org/unsd/demographic-](https://unstats.un.org/unsd/demographic-social/products/dyb/documents/dyb2017/table07.pdf)  
462 [social/products/dyb/documents/dyb2017/table07.pdf](https://unstats.un.org/unsd/demographic-social/products/dyb/documents/dyb2017/table07.pdf).
- 463 13. Martin BM, Restrepo AC, Mayfield H, et al. Using Regional Sero-Epidemiology SARS-CoV-2 Anti-S  
464 Antibodies in the Dominican Republic to Inform Targeted Public Health Response. *Trop Med Infect Dis*.  
465 2023;19:1-17. doi:doi.org/10.3390/tropicalmed8110493
- 466 14. R Core Team. R: A language and environment for statistical computing. R Foundation for Statistical  
467 Computing. 2021.
- 468 15. Arya S, Mount D, Kemp SE, Jefferis G. RANN: Fast Nearest Neighbour Search (Wraps ANN Library)  
469 Using L2 Metric. 2019. <https://cran.r-project.org/package=RANN>.
- 470 16. Lumley T. “survey: analysis of complex survey samples” R package version 4.0. 2020.
- 471 17. Harrison E, Drake T, Ots R. finalfit: Quickly Create Elegant Regression Results Tables and Plots when  
472 Modelling. 2021. <https://cran.r-project.org/package=finalfit>.
- 473 18. Wickham H. *Ggplot2: Elegant Graphics for Data Analysis*. New York: Springer-Verlag; 2016.
- 474 19. Lau CL, Watson CH, Lowry JH, et al. Human Leptospirosis Infection in Fiji: An Eco-epidemiological  
475 Approach to Identifying Risk Factors and Environmental Drivers for Transmission. *PLoS Negl Trop Dis*.  
476 2016. doi:10.1371/journal.pntd.0004405
- 477 20. Silva JA, Scialfa EA, Tringler M, et al. Seroprevalence of human leptospirosis in a rural community from  
478 Tandil, Argentina. Assessment of risk factors and spatial analysis. *Rev Argent Microbiol*. 2023;55(1):49-59.  
479 doi:10.1016/j.ram.2022.02.007
- 480 21. Everard J, Everard C. Leptospirosis in the Caribbean. *Rev Med Microbiol*. 1993;4(2):114.
- 481 22. Lau CL, Watson CH, Lowry JH, et al. Human Leptospirosis Infection in Fiji: An Eco-epidemiological  
482 Approach to Identifying Risk Factors and Environmental Drivers for Transmission. *PLoS Negl Trop Dis*.  
483 2016;10(1). doi:10.1371/journal.pntd.0004405
- 484 23. Hagedoorn NN, Maze MJ, Carugati M, et al. Global distribution of *Leptospira* serovar isolations and  
485 detections from animal host species: A systematic review and online database. *Trop Med Int Heal*.  
486 2024;29(3):161-172. doi:10.1111/tmi.13965
- 487 24. Pedersen K, Anderson TD, Maison RM, et al. *Leptospira* antibodies detected in wildlife in the USA and the  
488 US Virgin Islands. *J Wildl Dis*. 2018;54(3):450-459. doi:10.7589/2017-10-269
- 489 25. Lupidi R, Cinco M, Balanzin D, Delprete E, Varaldo PE. Serological follow-up of patients involved in a  
490 localized outbreak of leptospirosis. *J Clin Microbiol*. 1991;29(4):805-809. doi:10.1128/jcm.29.4.805-  
491 809.1991

- 492 26. Briskin EA, Casanovas-Massana A, Ryff KR, et al. Seroprevalence, Risk Factors, and Rodent Reservoirs of  
493 Leptospirosis in an Urban Community of Puerto Rico, 2015. *J Infect Dis.* 2019;220(9):1489-1497.  
494 doi:10.1093/infdis/jiz339
- 495 27. Mayfield HJ, Lowry JH, Watson CH, Kama M, Nilles EJ, Lau CL. Use of geographically weighted logistic  
496 regression to quantify spatial variation in the environmental and sociodemographic drivers of leptospirosis  
497 in Fiji: a modelling study. *Lancet Planet Heal.* 2018;2(5):e223-e232. doi:10.1016/S2542-5196(18)30066-4  
498  
499  
500
